# Supplementary material for: Highly improved visible-light-induced photocatalytic performance over BiOI/Ag2CO3 heterojunctions
Source: Royal Society of Chemistry journal article supplement (doi:10.1039/c7ra10423e), 2018-01-01
Supplement: c7ra10423e1.pdf [file c7ra10423e1.pdf]

## Supporting Information

### Highly improved visible-light-induced photocatalytic performance over BiOI/Ag<sub>2</sub>CO<sub>3</sub> heterojunctions

Nan Wang <sup>a</sup>, Lei Shi <sup>a\*</sup>, Lizhu Yao <sup>a</sup>, Caiyun Lu <sup>a</sup>, Yan Shi <sup>a</sup>, Jianmin Sun <sup>b \*</sup>

a: College of Chemistry, Chemical Engineering and Environmental Engineering,  
Liaoning Shihua University, Fushun 113001, China

b: State Key Laboratory of Urban Water Resource and Environment, MIIT Key  
Laboratory of Critical Materials Technology for New Energy Conversion and Storage,  
School of Chemistry and Chemical Engineering, Harbin Institute of Technology,  
Harbin 150080, China

\*Corresponding authors: Lei Shi, [shilei\\_hit@qq.com](mailto:shilei_hit@qq.com); Jianmin Sun, [sunjm@hit.edu.cn](mailto:sunjm@hit.edu.cn)

Tel: +86-18340316558

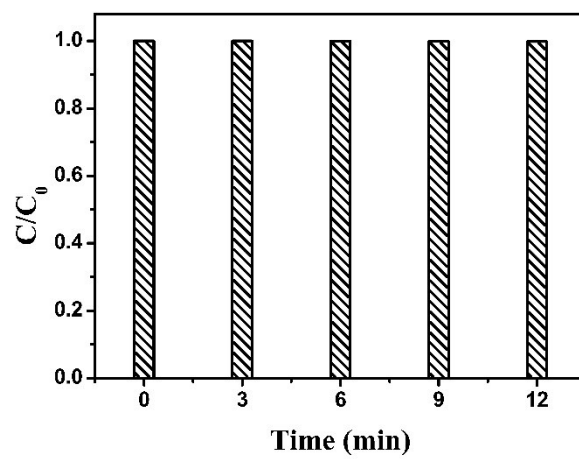

**Fig. S1** The leachability test over BiOI/Ag<sub>2</sub>CO<sub>3</sub> (20 wt%) composite.
